# Supplementary material for: TonB-Dependent Receptor Repertoire of Pseudomonas aeruginosa for Uptake of Siderophore-Drug Conjugates
Source: PubMed Central journal article supplement (PMC5971595; doi:10.1128/aac.00097-18), 2018-05-25
Supplement: AAC.00097-18_zac006187173s1.pdf [file AAC.00097-18_zac006187173s1.pdf]

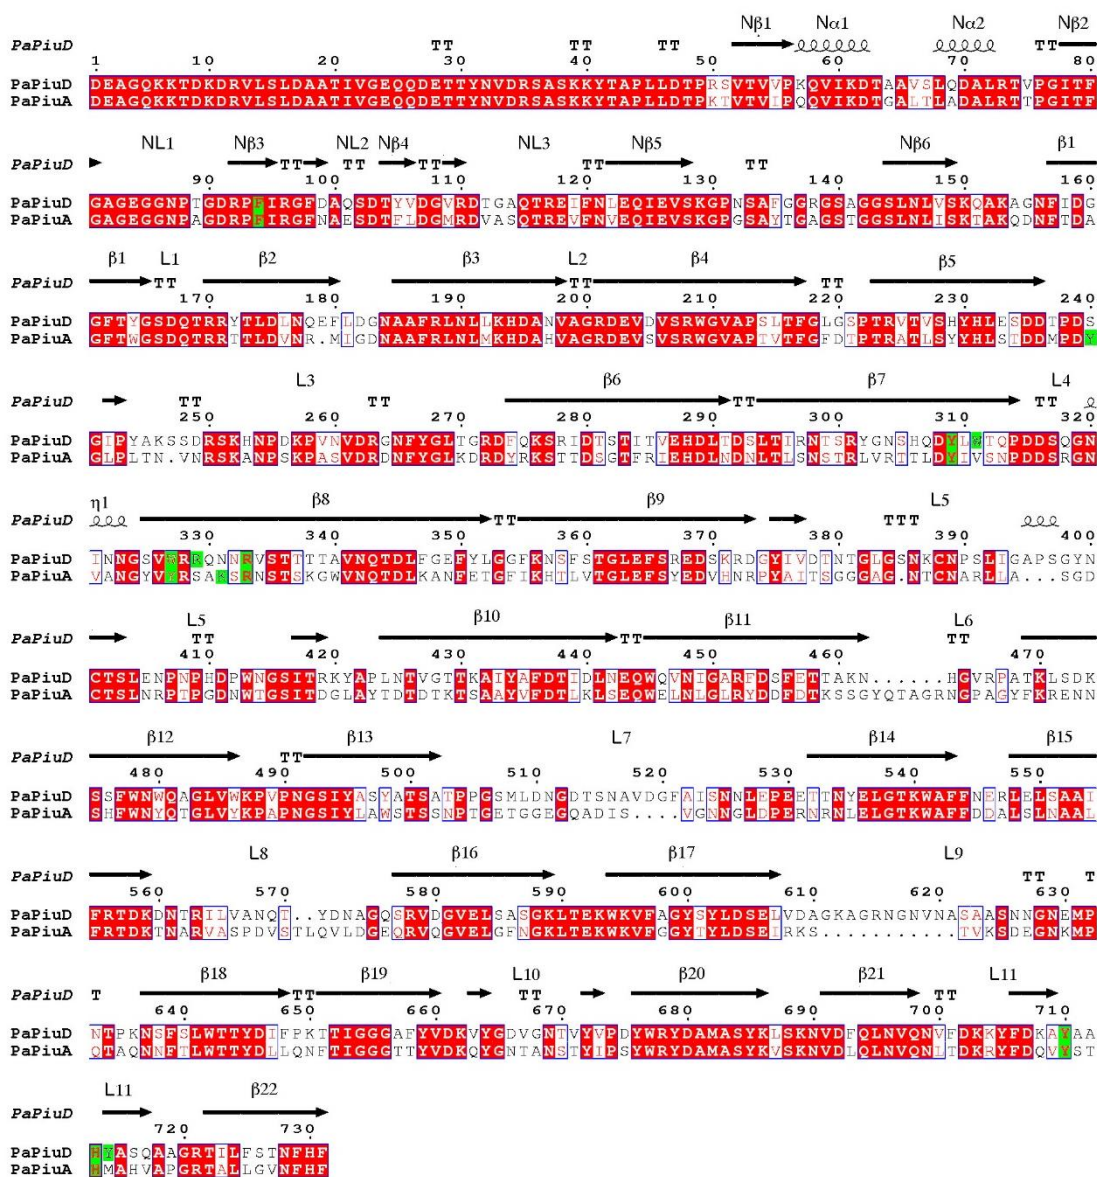

**FIG. S1. Structure-based sequence alignment of PiuD and PiuA.** Secondary structure elements of PiuD are illustrated above the alignment (numbering with respect to PiuD without the signal sequence). Residues forming the cluster of aromatic and positively charged residues are highlighted in green (see also Fig. S3). The alignment was performed with PROMALS3D (4) and drawn using ESPrnt (5).

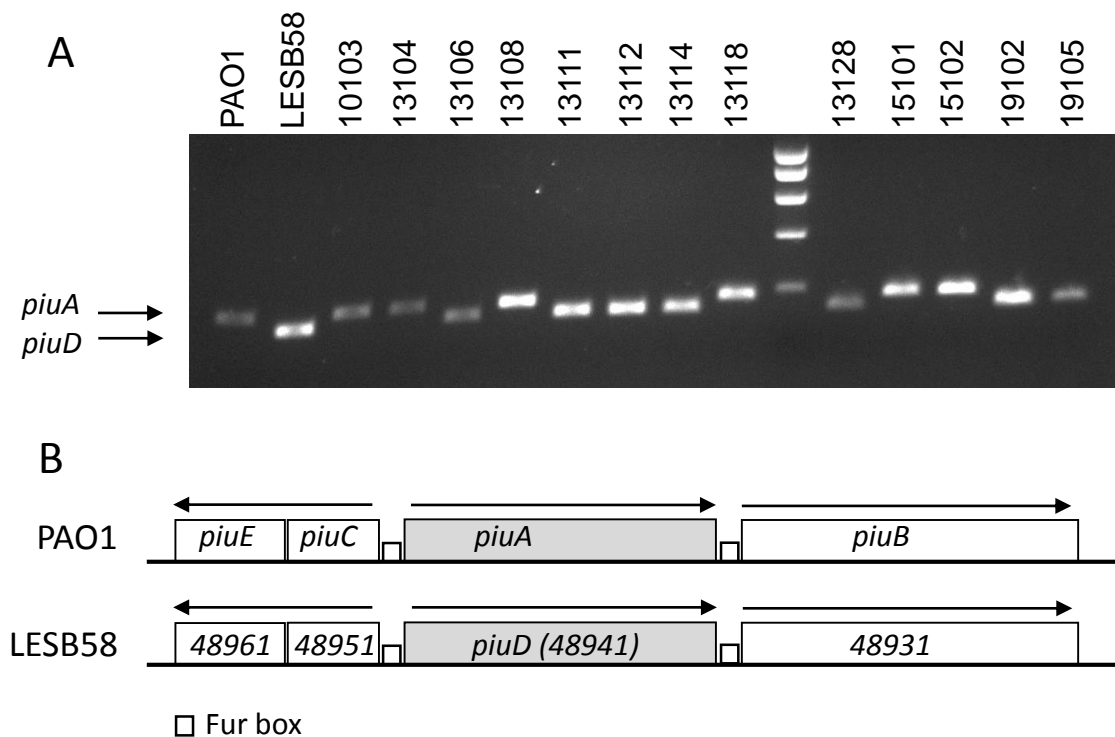

FIG. S2. Distribution of *piuA/piuD* genes in clinical isolates. (A) Multiplex PCR using *piuA* specific (PAO1) and *piuD*-specific (LESB58) primers was performed on genomic DNA from 13 genetically distinct isolates previously collected from ICU patients. Multiplex PCR shows a signal for either of the two genes in all isolates tested. (B) Strains carry either *piuA* or *piuD* genes located within a conserved genetic locus on the *P. aeruginosa* chromosome. Only *piuA* and *piuD* sequences (shaded in grey) differ between the two loci. Fur-boxes located upstream of *piuA/piuD* and *piuB* genes are conserved and indicated by a square. Arrows indicate putative operon structure.

PiuA

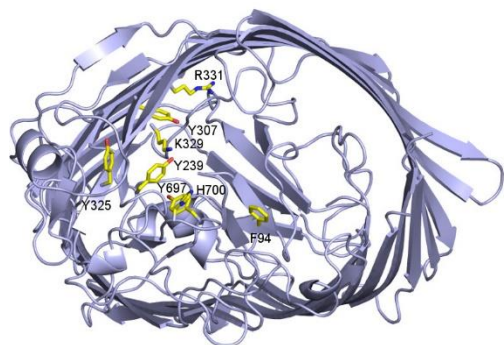

PiuD

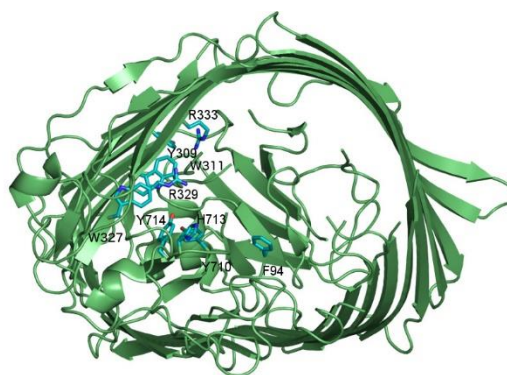

**Fig. S3.** Cluster of aromatic and charged residues in PiuA (light blue) and PiuD (green) of *P. aeruginosa*. Residues of the cluster are shown as sticks in yellow for PiuA and aquamarine for PiuD.

**Table S1 Bacterial strains and plasmids**

| Strains/plasmids                                               | Relevant characteristics                                                                                                                                                           | Reference, source            |
|----------------------------------------------------------------|------------------------------------------------------------------------------------------------------------------------------------------------------------------------------------|------------------------------|
| <b><i>P. aeruginosa</i></b>                                    |                                                                                                                                                                                    |                              |
| PAO1                                                           | PAO1, <i>mexT</i> non-functional                                                                                                                                                   | Laboratory collection        |
| $\Delta$ <i>piuA</i>                                           | unmarked deletion of <i>pirA</i> gene                                                                                                                                              | (1)                          |
| $\Delta$ <i>pirA</i>                                           | unmarked deletion of <i>pirA</i> gene                                                                                                                                              | (2)                          |
| $\Delta$ <i>piuA</i> $\Delta$ <i>pirA</i>                      | unmarked deletion of <i>pirA</i> , <i>piuA</i> genes                                                                                                                               | (2)                          |
| $\Delta$ <i>optJ</i>                                           | unmarked deletion of <i>optJ</i> gene                                                                                                                                              | This study                   |
| $\Delta$ <i>piuA</i> $\Delta$ <i>pirA</i> $\Delta$ <i>optJ</i> | unmarked deletion of <i>optJ</i> , <i>pirA</i> , <i>piuA</i> genes                                                                                                                 | This study                   |
| LESB58                                                         |                                                                                                                                                                                    |                              |
| $\Delta$ <i>piuD</i>                                           | unmarked deletion of <i>piuD</i> gene                                                                                                                                              | This study                   |
| $\Delta$ <i>pirA</i>                                           | unmarked deletion of <i>pirA</i> gene                                                                                                                                              | This study                   |
| $\Delta$ <i>piuD</i> $\Delta$ <i>pirA</i>                      | unmarked deletion of <i>pirA</i> , <i>piuD</i> genes                                                                                                                               | This study                   |
| <b><i>E. coli</i></b>                                          |                                                                                                                                                                                    |                              |
| ST18                                                           | <i>pro thi hsdR</i> <sup>+</sup> <i>Tmp</i> <sup>r</sup> <i>Sm</i> <sup>r</sup> ; chromosome:: <i>RP4-2</i><br>Tc:: <i>Mu-Kan</i> ::Tn7/ $\lambda$ <i>pir</i> $\Delta$ <i>hemA</i> | (3)                          |
| <b>Plasmids</b>                                                |                                                                                                                                                                                    |                              |
| pEXG2                                                          | gene replacement vector, Gm-R                                                                                                                                                      |                              |
| pIApX2                                                         | Broad-host range expression vector, Ap-R                                                                                                                                           | I. Attree (Grenoble, France) |
| ppiuA1.1                                                       | <i>piuA</i> from PAO1 cloned into pIApX2, Ap-R                                                                                                                                     | (2)                          |
| ppirA1.1                                                       | <i>pirA</i> from PAO1 cloned into pIApX2, Ap-R                                                                                                                                     | (2)                          |
| ppiuD                                                          | <i>piuD</i> from LESB58 cloned into pIApX2, Ap-R                                                                                                                                   | This study                   |
| poptJ                                                          | <i>optJ</i> (PA0434) from PAO1 cloned into pIApX2, Ap-R                                                                                                                            | This study                   |

|       |                                                         |            |
|-------|---------------------------------------------------------|------------|
| pfemA | <i>femA</i> (PA1910) from PAO1 cloned into pIApX2, Ap-R | This study |
| poptE | <i>optE</i> (PA2911) from PAO1 cloned into pIApX2, Ap-R | This study |
| ppfuA | <i>pfuA</i> (PA1322) from PAO1 cloned into pIApX2, Ap-R | This study |
| pfiuA | <i>fiuA</i> (PA0470) from PAO1 cloned into pIApX2, Ap-R | This study |
| pchtA | <i>chtA</i> (PA4675) from PAO1 cloned into pIApX2, Ap-R | This study |
| ppfeA | <i>pfeA</i> (PA2688) from PAO1 cloned into pIApX2, Ap-R | This study |
| pcirA | <i>cirA</i> (PA1922) from PAO1 cloned into pIApX2, Ap-R | This study |
| poptN | <i>optN</i> (PA1365) from PAO1 cloned into pIApX2, Ap-R | This study |
| poptF | <i>optF</i> (PA2590) from PAO1 cloned into pIApX2, Ap-R | This study |
| poptQ | <i>optQ</i> (PA2289) from PAO1 cloned into pIApX2, Ap-R | This study |
| pfoxA | <i>foxA</i> (PA2466) from PAO1 cloned into pIApX2, Ap-R | This study |

|         |                                                         |            |
|---------|---------------------------------------------------------|------------|
| pfpvA   | <i>fpvA</i> (PA2389) from PAO1 cloned into pEX1.8, Ap-R | This study |
| pfpvB   | <i>fpvB</i> (PA4168) from PAO1 cloned into pEX1.8, Ap-R | This study |
| pfptA   | <i>fptA</i> (PA4221) from PAO1 cloned into pIApX2, Ap-R | This study |
| poptO   | <i>optO</i> (PA2335) from PAO1 cloned into pIApX2, Ap-R | This study |
| poptP   | <i>optP</i> (PA0192) from PAO1 cloned into pIApX2, Ap-R | This study |
| poptL   | <i>optL</i> (PA2089) from PAO1 cloned into pIApX2, Ap-R | This study |
| pPA1613 | PA1613 from PAO1 cloned into pIApX2, Ap-R               | This study |
| poptR   | <i>optR</i> (PA3268) from PAO1 cloned into pIApX2, Ap-R | This study |
| pfvbA   | <i>fvbA</i> (PA4156) from PAO1 cloned into pIApX2, Ap-R | This study |
| ppupB   | <i>pupB</i> (PA0151) from PAO1 cloned into pIApX2, Ap-R | This study |
| psppR   | <i>sppR</i> (PA2057) from PAO1 cloned into pIApX2, Ap-R | This study |

|                 |                                                                                                           |            |
|-----------------|-----------------------------------------------------------------------------------------------------------|------------|
| poptM           | <i>optM</i> (PA2070) from PAO cloned into<br>pIApX2, Ap-R                                                 | This study |
| pznuD           | <i>znuD</i> (PA0781) from PAO1 cloned into<br>pIApX2, Ap-R                                                | This study |
| pEX18Gm-pirA-ko | contains a 1.4-kb fusion fragment of the up-<br>and downstream region of <i>pirA</i> from LESB58,<br>Gm-R | This study |
| pEX18Gm-piuD-ko | 1.1-kb fusion fragment of the 5' and 3' region<br>of <i>piuD</i> from LESB58, Gm-R                        | This study |
| pEXG2-optJ-ko   | contains a 1.4-kb fusion fragment of the up-<br>and downstream region of <i>optJ</i> , Gm-R               | This study |

---

<sup>a</sup> Ap, ampicillin; Gm, gentamicin; Km, kanamycin; Sm, streptomycin, Tc, tetracycline; Tmp, trimethoprim.

**TABLE S2.** Primers used in this study

| <b>Primer</b> | <b>Sequence (5' - 3')</b>            | <b>Characteristic</b> |
|---------------|--------------------------------------|-----------------------|
| piuA1         | TACTTCAAGCGCGAGAACAACA               | qPCR                  |
| piuA2         | CCAGTTCGAGGTTACGGTTACG               | qPCR                  |
| pirA1         | AACAAGACCGATTCCGGACGAT               | qPCR                  |
| pirA2         | GTGCCGTTGTTGTTCTGGGTA                | qPCR                  |
| piuD-Xba      | ACACTCTAGATTGGCCATGTAAAACCGCC        | cloning               |
| piuD-Hind     | ACACAAGCTTGAAAGCCCCATCCCGTAGAG       | cloning               |
| piuD1         | CGATCCATGGAATGGCAGTATT               | qPCR                  |
| piuD2         | GGTCTTACACCGTGGTTCTTCG               | qPCR                  |
| piuD-39016-F  | AGGGGCGTCATGAACGAGGCCGGGCAGAAAAAG    | Purification of PiuD  |
| piuD-39016-R  | AATTTCTCGAGGAAGTGGAAGTTGGTGCTGAACAGT | Purification of PiuD  |
| OptJ-Bam      | ACACGGATCCCATTTCATCCGTCGCCG          | Expression of OptJ    |
| OptJ-Hind     | ACACAAGCTTGAGACGAACCAGAGCACCATCA     | Expression of OptJ    |
| OptQ-Hind     | ACACAAGCTTGTCGCGGAAAATTCTCGTTG       | Expression of OptQ    |
| OptQ-Xba      | ACACTCTAGAAAGCCCCTTCGATACCTTG        | Expression of OptQ    |
| FptA-Bam      | ACACGGATCCCCGGAGACGATTTCTTCATAA      | Expression of FptA    |
| FptA-Hind     | ACACAAGCTTAGCCCCGCGAGTCAACAGATAG     | Expression of FptA    |
| OptF-Bam      | ACACGGATCCAATTCATATTGCCCGACGCTG      | Expression of OptF    |
| OptF-Nsi      | ACACATGCATGTCGCGGAAAATTCTCGTTG       | Expression of OptF    |
| FiuA-Xba      | ACACTCTAGAGGAGGCATTGAGACTCGTTT       | Expression of FiuA    |



|               |                                  |                    |
|---------------|----------------------------------|--------------------|
| FiuA-Hind     | ACACAAGCTTGAAGGTACGTTCTGCGGTAGG  | Expression of FiuA |
| FoxA-Xba      | ACACTCTAGACGGCTTTACCGATTGAACAC   | Expression of FoxA |
| FoxA-Hind     | ACACAAGCTTGGTAGCCAGACCGACATAGC   | Expression of FoxA |
| FemA-Xba      | ACACTCTAGACGACCTGAGACCTTTTTTCCTT | Expression of FemA |
| FemA-Hind     | ACACAAGCTTAGATCAGGCTGGTCCATTTGT  | Expression of FemA |
| FhuA-Xba      | ACACTCTAGAGACTCTGCCGTTGGTTATCAG  | Expression of FhuA |
| FhuA-Hind     | ACACAAGCTTCGCAGTGAAAAGTTCAGAGG   | Expression of FhuA |
| OptE-Xba      | ACACTCTAGACCCGGTCATGAGATGGAAC    | Expression of OptE |
| OptE-Hind     | ACACAAGCTTGAAGGGACGACATGGCTACT   | Expression of OptE |
| ChtA-Xba      | ACACTCTAGACATGCCTCATTGAAACAGT    | Expression of ChtA |
| ChtA-Hind     | ACACAAGCTTGCTCTTTCCCACGAGTTCC    | Expression of ChtA |
| CirA-Xba      | ACACTCTAGACTCGCCTCGATGAAGAAGAAAC | Expression of CirA |
| CirA-Hind     | ACACAAGCTTGCCGCAGAAGAGTAGCGAAC   | Expression of CirA |
| OptN-Bam      | ACACGGATCCGTCGAGATCCAACGCAAATC   | Expression of OptN |
| OptN-Xba      | ACACTCTAGAGCACACTGAGCGCAATTGG    | Expression of OptN |
| PfeA-Bam      | ACACGGATCCTCTTGCATTTGCTGCATTG    | Expression of PfeA |
| PfeA-Hind     | ACACAAGCTTCGACGAGCAGGGAGGTTCTC   | Expression of PfeA |
| PA0781-Bam    | ACACGGATCCGGGTCTACCGACACAAAAAGA  | Expression of ZnuD |
| PA0781-Hind   | ACACAAGCTTGGGAGTGGTGTAGGACGGATAA | Expression of ZnuD |
| PA4156-F-Bam  | ACACGGATCCGACGGGCGTAGGAGATTTCA   | Expression of FvbA |
| PA4156-R-Hind | ACACAAGCTTGAAGATGCCTTCGATGTTGCT  | Expression of FvbA |

|               |                                 |                      |
|---------------|---------------------------------|----------------------|
| PA2089-Bam-F  | ACACGGATCCTGAAAATCGGTACGGGCAAT  | Expression of OptL   |
| PA2089-Hind-R | ACACAAGCTTAGTTCGATGCTCATGGTTCGT | Expression of OptL   |
| PA2070-Bam-F  | ACACGGATCCTCTAAGCCGTCCCTGGAAAAT | Expression of OptM   |
| PA2070-Hind-R | ACACAAGCTTACCGGATCTGGTAGCTGGAC  | Expression of OptM   |
| PA1613-Bam-F  | ACACGGATCCGCAATCACGCCATTATACGG  | Expression of PA1613 |
| PA1613-Hind-R | ACACAAGCTTCGAGACAGCAGACGACGAG   | Expression of PA1613 |
| PA0192-Bam-F  | ACACGGATCCTTCGAACCTTTCGCCAGAT   | Expression of OptP   |
| PA0192-Hind-R | ACACAAGCTTGTGCTGCATTGCTCATGT    | Expression of OptP   |
| PA4837-Bam-F  | ACACGGATCCGAGATAGAGCCGGGCATTGTA | Expression of OptC   |
| PA4837-Hind-R | ACACAAGCTTGCGGGTAGAGGGCTCAGTAGT | Expression of OptC   |
| PA2057-Xba-F  | ACACTCTAGATGAGTGTCGACCAGGCCCT   | Expression of SppR   |
| PA2057-Hind-R | ACACAAGCTTGCTCGTCGTAGAGCGTGATG  | Expression of SppR   |
| PA3268-Bam-F  | ACACGGATCCGTAATTTTGCGCCCACTTTT  | Expression of OptR   |
| PA3268-Hind-R | ACACAAGCTTCGTCATCGATTGGACTGCAT  | Expression of OptR   |

---

**Table S3** Crystallographic data and refinement statistics

| 5NEC                                                 |                           |
|------------------------------------------------------|---------------------------|
| <b>Data collection</b>                               |                           |
| Space group                                          | C2                        |
| Cell dimensions                                      |                           |
| <i>a</i> , <i>b</i> , <i>c</i> (Å)                   | 164.52, 136.45,<br>118.95 |
| $\alpha$ , $\beta$ , $\gamma$ (°)                    | 90.00, 132.04, 90.00      |
| Resolution (Å)                                       | 100-2.3 (2.38-2.3)*       |
| <i>R</i> <sub>sym</sub> or <i>R</i> <sub>merge</sub> | 0.081 (1.044)             |
| <i>I</i> / $\sigma I$                                | 9.86 (1.23)               |
| Completeness (%)                                     | 97.6 (85.1)               |
| Redundancy                                           | 3.58 (2.94)               |
| <i>CC half</i>                                       | <b>-0.569</b>             |
| <b>Refinement</b>                                    |                           |
| Resolution (Å)                                       | 91.03-2.3                 |
| No. reflections                                      | 80547                     |
| <i>R</i> <sub>work</sub> / <i>R</i> <sub>free</sub>  | 0.223/0.249               |
| No. atoms                                            |                           |
| Protein                                              | 10073                     |
| Ligand/ion                                           | 16                        |
| Water                                                | 65                        |
| B-factors                                            |                           |
| Protein                                              | 57.85 (A)-56.31(B)        |
| Ligand/Water                                         | 49.68 (A)-44.23 (B)       |

**TABLE S4** Effect of *optJ* deletion in *piuA* and *pirA* deletion strains of *P. aeruginosa* PAO1

| Strain                              | MIC (mg/liter) |      |     |      |     |
|-------------------------------------|----------------|------|-----|------|-----|
|                                     | BAL            | MC-1 | ATM | CFD  | CAZ |
| PAO1                                | 1              | 0.25 | 4   | 0.25 | 2   |
| $\Delta piuA$                       | 8              | 4    | 4-8 | 8    | 2   |
| $\Delta pirA$                       | 1              | 0.5  | 4   | 0.5  | 2   |
| $\Delta optJ$                       | 1              | 0.25 | 4   | 0.25 | 2   |
| $\Delta piuA\Delta optJ$            | 16             | 8    | 4   | 8    | 2   |
| $\Delta pirA\Delta optJ$            | 2              | 0.5  | 4   | 0.5  | 2   |
| $\Delta piuA\Delta pirA$            | 16             | >16  | 4   | 16   | 2   |
| $\Delta piuA\Delta pirA\Delta optJ$ | 32             | >16  | 4   | 16   | 2   |

BAL, BAL30072; ATM, aztreonam; CFD, cefiderocol; CFZ, ceftazidime

**Table S5.** MICs of siderophore-drug conjugates for PAO1 derivatives determined in iron-sufficient and iron-limited media

| Strain                                             | MIC (mg/liter) |       |       |      |       |       |     |       |       |     |       |       |     |       |       |
|----------------------------------------------------|----------------|-------|-------|------|-------|-------|-----|-------|-------|-----|-------|-------|-----|-------|-------|
|                                                    | BAL            |       |       | MC-1 |       |       | ATM |       |       | CFD |       |       | CAZ |       |       |
|                                                    | MHB            | MHB-C | M9CAA | MHB  | MHB-C | M9CAA | MHB | MHB-C | M9CAA | MHB | MHB-C | M9CAA | MHB | MHB-C | M9CAA |
| PAO1                                               | 1              | 0.5   | 0.06  | 0.5  | 0.25  | 0.01  | 4   | 4     | 2     | 0.5 | 0.06  | 0.03  | 2   | 2     | 1     |
| $\Delta$ <i>piuA</i>                               | 8              | 1     | 0.5   | 8    | 1     | 0.25  | 4   | 4     | 4     | 8   | 1     | 0.25  | 2   | 2     | 1     |
| $\Delta$ <i>pirA</i>                               | 1              | 0.5   | 0.06  | 0.5  | 0.5   | 0.01  | 4   | 4     | 2     | 0.5 | 0.06  | 0.03  | 2   | 2     | 1     |
| $\Delta$ <i>piuA<math>\Delta</math><i>pirA</i></i> | 16             | 4     | 1     | 16   | 2     | 1     | 4   | 4     | 4     | 16  | 0.5   | 0.25  | 2   | 2     | 1     |

Iron-sufficient: MHB, Mueller-Hinton broth; iron-limited: MHB-C, chelex-treated MHB; M9CAA, M9 salts based casamino acid medium

## References

1. **Van Delden C, Page MG, Köhler T.** 2013. Involvement of Fe uptake systems and AmpC beta-lactamase in susceptibility to the siderophore monosulfactam BAL30072 in *Pseudomonas aeruginosa*. *Antimicrob Agents Chemother* **57**:2095-2102.
2. **Moynié L, Luscher A, Rolo D, Pletzer D, Tortajada A, Weingart H, Braun Y, Page MG, Naismith JH, Köhler T.** 2017. Structure and Function of the PiuA and PirA Siderophore-Drug Receptors from *Pseudomonas aeruginosa* and *Acinetobacter baumannii*. *Antimicrob Agents Chemother* **61**.
3. **Thoma S, Schobert M.** 2009. An improved *Escherichia coli* donor strain for diparental mating. *FEMS Microbiol Lett* **294**:127-132.
4. **Pei J, Kim BH, Grishin NV.** 2008. PROMALS3D: a tool for multiple protein sequence and structure alignments. *Nucleic Acids Res* **36**:2295-300.
5. **Robert X, Gouet P.** 2014. Deciphering key features in protein structures with the new ENDscript server. *Nucleic Acids Res* **42**:W320-4.
